# Supplementary material
Source: publisher figshare collection journal article supplement (https://sage.figshare.com/ndownloader/files/21514203)
Supplement: Supplementary file 1 [file 21514203]

Supplementary Figure

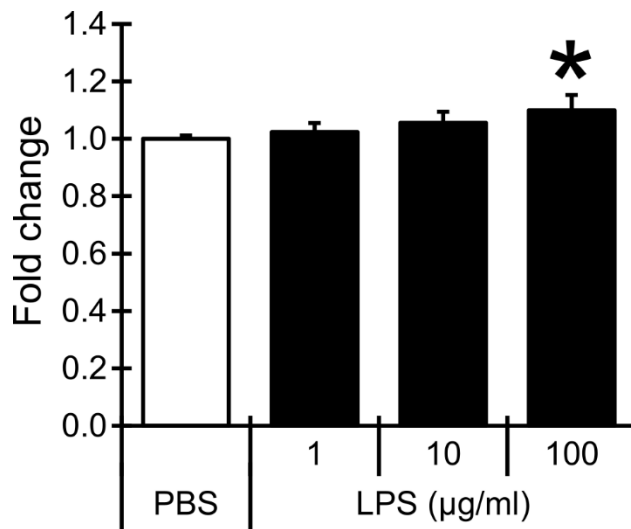

**Fig. S1. A low concentration of LPS did not alter growth of CT26 cells.** CT26 cells were treated with LPS (1–100 ng/ml) and cell growth was evaluated at 48 hrs after treatment by MTT assay as described in Materials and Methods. \*,  $P < 0.05$  compared to PBS-treated control.
